# Supplementary material
Source: publisher figshare collection journal article supplement (https://sage.figshare.com/ndownloader/files/17839925)
Supplement: Supplementary file 1 [file 17839925]

## Sheet: TargetScan7
Target gene	Representative transcript	Gene name	3P-seq tags + 5	Conserved sites total	Conserved 8mer sites	Conserved 7mer-m8 sites	Conserved 7mer-A1 sites	Poorly conserved sites total	Poorly conserved 8mer sites	Poorly conserved 7mer-m8 sites	Poorly conserved 7mer-A1 sites	6mer sites	Representative miRNA	Cumulative weighted context++ score	Total context++ score	Aggregate PCT	Previous TargetScan publication(s)
CTDNEP1	ENST00000574322.1	CTD nuclear envelope phosphatase 1	2165	1	1	0	0	1	1	0	0	1	hsa-miR-122-5p	-0.81	-0.82	< 0.1	2009, 2011
ALDOA	ENST00000569798.1	aldolase A, fructose-bisphosphate	21644	1	1	0	0	4	1	1	2	1	hsa-miR-122-5p	-0.79	-0.84	0.55	2005, 2007, 2009, 2011
RFXAP	ENST00000255476.2	regulatory factor X-associated protein	682	1	1	0	0	1	0	1	0	0	hsa-miR-122-5p	-0.72	-0.72	< 0.1	2011
PLEKHB2	ENST00000438882.2	pleckstrin homology domain containing, family B (evectins) member 2	1358	1	1	0	0	1	1	0	0	0	hsa-miR-122-5p	-0.72	-0.75	< 0.1	2011
MASP1	ENST00000296280.6	mannan-binding lectin serine peptidase 1 (C4/C2 activating component of Ra-reactive factor)	838	2	1	1	0	0	0	0	0	3	hsa-miR-122-5p	-0.7	-0.7	0.59	2011
CLIC4	ENST00000374379.4	chloride intracellular channel 4	226	2	1	1	0	0	0	0	0	0	hsa-miR-122-5p	-0.68	-0.68	0.36	2005, 2007, 2009, 2011
SLC52A2	ENST00000526752.1	solute carrier family 52 (riboflavin transporter), member 2	483	1	1	0	0	0	0	0	0	0	hsa-miR-122-5p	-0.66	-0.66	0.3	2005, 2007, 2009, 2011
PRKRA	ENST00000325748.4	protein kinase, interferon-inducible double stranded RNA dependent activator	632	1	1	0	0	0	0	0	0	0	hsa-miR-122-5p	-0.59	-0.59	< 0.1	2009, 2011
NICN1	ENST00000273598.3	nicolin 1	244	1	1	0	0	1	0	0	1	0	hsa-miR-122-5p	-0.55	-0.55	< 0.1	2009, 2011
AC002451.1	ENST00000601424.1	Protein LOC100996577	5	1	1	0	0	0	0	0	0	1	hsa-miR-122-5p	-0.55	-0.55	< 0.1
ST6GALNAC4	ENST00000335791.5	ST6 (alpha-N-acetyl-neuraminyl-2,3-beta-galactosyl-1,3)-N-acetylgalactosaminide alpha-2,6-sialyltransferase 4	178	1	1	0	0	0	0	0	0	1	hsa-miR-122-5p	-0.54	-0.54	< 0.1	2009, 2011
P4HA1	ENST00000307116.2	prolyl 4-hydroxylase, alpha polypeptide I	38	1	1	0	0	0	0	0	0	0	hsa-miR-122-5p	-0.53	-0.53	0.54	2005, 2007, 2009, 2011
FUNDC2	ENST00000369498.3	FUN14 domain containing 2	130	1	1	0	0	0	0	0	0	2	hsa-miR-122-5p	-0.53	-0.55	0.36	2005, 2007, 2009, 2011
CLIC1	ENST00000375784.3	chloride intracellular channel 1	129	1	1	0	0	0	0	0	0	0	hsa-miR-122-5p	-0.52	-0.52	< 0.1
RBP5	ENST00000266560.3	retinol binding protein 5, cellular	256	1	1	0	0	0	0	0	0	0	hsa-miR-122-5p	-0.52	-0.52	< 0.1
CCNG1	ENST00000340828.2	cyclin G1	1547	1	1	0	0	0	0	0	0	0	hsa-miR-122-5p	-0.49	-0.5	0.5	2005, 2007, 2009, 2011
EPO	ENST00000252723.2	erythropoietin	181	1	1	0	0	0	0	0	0	2	hsa-miR-122-5p	-0.48	-0.48	0.49	2007, 2009, 2011
BAI2	ENST00000398556.3	brain-specific angiogenesis inhibitor 2	30	1	1	0	0	0	0	0	0	0	hsa-miR-122-5p	-0.48	-0.48	0.39	2005, 2007, 2009, 2011
TBR1	ENST00000389554.3	T-box, brain, 1	5	1	1	0	0	1	0	1	0	0	hsa-miR-122-5p	-0.47	-0.47	< 0.1
PIGS	ENST00000395346.2	phosphatidylinositol glycan anchor biosynthesis, class S	1015	1	1	0	0	0	0	0	0	1	hsa-miR-122-5p	-0.47	-0.47	< 0.1
G6PC3	ENST00000269097.4	glucose 6 phosphatase, catalytic, 3	429	1	1	0	0	0	0	0	0	0	hsa-miR-122-5p	-0.46	-0.46	< 0.1	2011
ZNF827	ENST00000379448.4	zinc finger protein 827	17	2	1	1	0	0	0	0	0	1	hsa-miR-122-5p	-0.45	-0.77	0.26	2005, 2007
DUSP4	ENST00000240100.2	dual specificity phosphatase 4	245	1	1	0	0	0	0	0	0	0	hsa-miR-122-5p	-0.45	-0.45	0.48	2009, 2011
CD320	ENST00000537716.2	CD320 molecule	36	1	0	1	0	1	0	1	0	0	hsa-miR-122-5p	-0.44	-0.44	0.33	2003, 2005, 2007, 2009, 2011
SLC25A34	ENST00000294454.5	solute carrier family 25, member 34	5	1	1	0	0	0	0	0	0	0	hsa-miR-122-5p	-0.43	-0.43	0.53	2007, 2009, 2011
FOXK2	ENST00000335255.5	forkhead box K2	450	1	0	0	1	1	0	1	0	0	hsa-miR-122-5p	-0.43	-0.43	< 0.1	2009, 2011
SLC1A5	ENST00000542575.2	solute carrier family 1 (neutral amino acid transporter), member 5	681	1	0	1	0	7	0	0	7	1	hsa-miR-122-5p	-0.42	-0.6	0.25	2005, 2007, 2011
RIMS1	ENST00000348717.5	regulating synaptic membrane exocytosis 1	45	1	0	1	0	2	0	1	1	0	hsa-miR-122-5p	-0.42	-0.42	0.29	2009, 2011
SLC7A1	ENST00000380752.5	solute carrier family 7 (cationic amino acid transporter, y+ system), member 1	338	2	1	1	0	1	1	0	0	1	hsa-miR-122-5p	-0.41	-0.44	< 0.1	2005, 2007, 2011
PDK4	ENST00000005178.5	pyruvate dehydrogenase kinase, isozyme 4	5549	1	1	0	0	0	0	0	0	0	hsa-miR-122-5p	-0.41	-0.41	0.42	2009, 2011
NPEPPS	ENST00000322157.4	aminopeptidase puromycin sensitive	2194	1	1	0	0	2	0	0	2	0	hsa-miR-122-5p	-0.41	-0.42	0.55	2005, 2007, 2009, 2011
MICU3	ENST00000318063.5	mitochondrial calcium uptake family, member 3	9	1	1	0	0	0	0	0	0	0	hsa-miR-122-5p	-0.41	-0.41	0.47	2005, 2007, 2009, 2011
CCAR1	ENST00000265872.6	cell division cycle and apoptosis regulator 1	1502	1	0	1	0	1	1	0	0	0	hsa-miR-122-5p	-0.4	-0.6	0.32
IGSF5	ENST00000380588.4	immunoglobulin superfamily, member 5	7	1	0	1	0	0	0	0	0	0	hsa-miR-122-5p	-0.4	-0.4	0.33	2007, 2009, 2011
TBC1D10B	ENST00000409939.3	TBC1 domain family, member 10B	174	1	1	0	0	0	0	0	0	0	hsa-miR-122-5p	-0.39	-0.39	0.16	2005, 2007, 2009, 2011
PIP4K2A	ENST00000376573.4	phosphatidylinositol-5-phosphate 4-kinase, type II, alpha	632	1	1	0	0	0	0	0	0	0	hsa-miR-122-5p	-0.39	-0.42	0.35	2009, 2011
GRHL2	ENST00000251808.3	grainyhead-like 2 (Drosophila)	5	1	1	0	0	1	0	1	0	1	hsa-miR-122-5p	-0.38	-0.38	0.51	2009, 2011
GALNTL6	ENST00000506823.1	UDP-N-acetyl-alpha-D-galactosamine:polypeptide N-acetylgalactosaminyltransferase-like 6	26	1	1	0	0	0	0	0	0	0	hsa-miR-122-5p	-0.38	-0.38	0.2	2009
SLC41A1	ENST00000367137.3	solute carrier family 41 (magnesium transporter), member 1	300	1	0	1	0	1	0	1	0	0	hsa-miR-122-5p	-0.38	-0.38	0.24	2009, 2011
CLIC5	ENST00000339561.6	chloride intracellular channel 5	21	1	1	0	0	2	0	0	2	1	hsa-miR-122-5p	-0.36	-0.48	0.25	2007, 2009, 2011
SSR2	ENST00000529008.1	signal sequence receptor, beta (translocon-associated protein beta)	1344	1	0	1	0	0	0	0	0	0	hsa-miR-122-5p	-0.36	-0.36	ORF
PEG10	ENST00000482108.1	paternally expressed 10	8778	1	1	0	0	1	0	1	0	0	hsa-miR-122-5p	-0.35	-0.35	0.42	2009, 2011
KDELC2	ENST00000323468.5	KDEL (Lys-Asp-Glu-Leu) containing 2	667	1	0	1	0	2	0	0	2	0	hsa-miR-122-5p	-0.35	-0.36	0.19	2009, 2011
ADSS	ENST00000366535.3	adenylosuccinate synthase	2881	1	0	1	0	0	0	0	0	0	hsa-miR-122-5p	-0.34	-0.34	0.27
MIPOL1	ENST00000327441.7	mirror-image polydactyly 1	45	1	1	0	0	2	1	0	1	0	hsa-miR-122-5p	-0.34	-0.47	0.55	2005, 2007, 2009, 2011
C20orf112	ENST00000359676.5	chromosome 20 open reading frame 112	148	2	2	0	0	1	0	1	0	1	hsa-miR-122-5p	-0.34	-0.4	0.76	2009, 2011
GRAMD3	ENST00000285689.3	GRAM domain containing 3	232	1	1	0	0	0	0	0	0	0	hsa-miR-122-5p	-0.34	-0.35	0.19	2007, 2009, 2011
DUSP2	ENST00000288943.4	dual specificity phosphatase 2	41	1	0	1	0	2	0	0	2	1	hsa-miR-122-5p	-0.34	-0.41	0.34	2009, 2011
FKBP5	ENST00000536438.1	FK506 binding protein 5	32	2	0	1	1	3	0	0	3	0	hsa-miR-122-5p	-0.33	-0.36	0.34	2007, 2009, 2011
MAF1	ENST00000322428.5	MAF1 homolog (S. cerevisiae)	698	1	1	0	0	0	0	0	0	0	hsa-miR-122-5p	-0.33	-0.33	0.35	2005, 2007, 2009, 2011
ANKRD13C	ENST00000370944.4	ankyrin repeat domain 13C	369	1	0	1	0	0	0	0	0	0	hsa-miR-122-5p	-0.33	-0.33	0.34	2007, 2009, 2011
NT5C3A	ENST00000610140.1	5'-nucleotidase, cytosolic IIIA	165	1	0	1	0	0	0	0	0	0	hsa-miR-122-5p	-0.32	-0.32	0.25	2009, 2011
CCNYL1	ENST00000295414.3	cyclin Y-like 1	111	1	0	0	1	1	1	0	0	0	hsa-miR-122-5p	-0.32	-0.36	< 0.1	2007
CANX	ENST00000247461.4	calnexin	17053	1	1	0	0	0	0	0	0	0	hsa-miR-122-5p	-0.32	-0.39	0.5	2009, 2011
MMGT1	ENST00000305963.2	membrane magnesium transporter 1	113	1	0	1	0	0	0	0	0	0	hsa-miR-122-5p	-0.32	-0.32	0.32	2005, 2007, 2009, 2011
SUCLA2	ENST00000378654.3	succinate-CoA ligase, ADP-forming, beta subunit	62	1	0	1	0	0	0	0	0	0	hsa-miR-122-5p	-0.31	-0.31	< 0.1
BRPF1	ENST00000383829.2	bromodomain and PHD finger containing, 1	351	1	1	0	0	0	0	0	0	0	hsa-miR-122-5p	-0.31	-0.31	0.45	2005, 2007, 2009, 2011
ARL2	ENST00000246747.4	ADP-ribosylation factor-like 2	7073	1	0	1	0	0	0	0	0	0	hsa-miR-122-5p	-0.3	-0.3	< 0.1
NOD2	ENST00000300589.2	nucleotide-binding oligomerization domain containing 2	8	1	1	0	0	0	0	0	0	0	hsa-miR-122-5p	-0.3	-0.3	< 0.1	2011
CHMP3	ENST00000263856.4	charged multivesicular body protein 3	2466	1	0	1	0	2	0	0	2	2	hsa-miR-122-5p	-0.3	-0.36	0.3	2009, 2011
RNF103-CHMP3	ENST00000604011.1	RNF103-CHMP3 readthrough	2466	1	0	1	0	2	0	0	2	2	hsa-miR-122-5p	-0.3	-0.36	0.3
CALM3	ENST00000291295.9	calmodulin 3 (phosphorylase kinase, delta)	3982	1	0	1	0	0	0	0	0	0	hsa-miR-122-5p	-0.3	-0.3	0.24	2005, 2007, 2009, 2011
SPRY2	ENST00000377102.1	sprouty homolog 2 (Drosophila)	139	1	0	1	0	0	0	0	0	0	hsa-miR-122-5p	-0.29	-0.29	0.33	2009, 2011
FOXP2	ENST00000408937.3	forkhead box P2	169	2	0	1	1	0	0	0	0	0	hsa-miR-122-5p	-0.29	-0.29	0.33	2005, 2007, 2009, 2011
CPEB1	ENST00000450751.2	cytoplasmic polyadenylation element binding protein 1	5	1	0	1	0	0	0	0	0	0	hsa-miR-122-5p	-0.29	-0.29	0.19	2005, 2007
OCLN	ENST00000355237.2	occludin	5	1	1	0	0	0	0	0	0	0	hsa-miR-122-5p	-0.28	-0.28	0.51	2011
RP11-181C3.1	ENST00000501499.1	Uncharacterized protein	7	1	0	1	0	0	0	0	0	0	hsa-miR-122-5p	-0.28	-0.28	0.23
SLC25A51	ENST00000380590.3	solute carrier family 25, member 51	170	1	1	0	0	1	0	0	1	0	hsa-miR-122-5p	-0.27	-0.28	0.52
HNRNPU	ENST00000444376.2	heterogeneous nuclear ribonucleoprotein U (scaffold attachment factor A)	5343	1	1	0	0	0	0	0	0	0	hsa-miR-122-5p	-0.26	-0.43	0.55	2005, 2007, 2009, 2011
CTNND2	ENST00000304623.8	catenin (cadherin-associated protein), delta 2	25	1	0	1	0	0	0	0	0	0	hsa-miR-122-5p	-0.26	-0.26	0.32	2009, 2011
TBC1D22B	ENST00000373491.3	TBC1 domain family, member 22B	127	1	0	0	1	2	0	0	2	2	hsa-miR-122-5p	-0.26	-0.26	< 0.1	2011
CS	ENST00000548567.1	citrate synthase	52	1	0	1	0	0	0	0	0	0	hsa-miR-122-5p	-0.26	-0.26	0.34	2005, 2007, 2009, 2011
KIF5B	ENST00000302418.4	kinesin family member 5B	635	1	1	0	0	0	0	0	0	0	hsa-miR-122-5p	-0.26	-0.28	0.28	2011
AC137932.1	ENST00000602042.1		5	1	0	0	1	1	0	1	0	0	hsa-miR-122-5p	-0.26	-0.26	< 0.1
ARFGEF1	ENST00000262215.3	ADP-ribosylation factor guanine nucleotide-exchange factor 1 (brefeldin A-inhibited)	70	1	1	0	0	1	1	0	0	0	hsa-miR-122-5p	-0.26	-0.35	0.42	2009, 2011
HECTD3	ENST00000372168.3	HECT domain containing E3 ubiquitin protein ligase 3	45	1	1	0	0	0	0	0	0	1	hsa-miR-122-5p	-0.23	-0.23	0.48	2009, 2011
DENND2C	ENST00000393276.3	DENN/MADD domain containing 2C	51	1	1	0	0	0	0	0	0	0	hsa-miR-122-5p	-0.23	-0.23	< 0.1
KLHL18	ENST00000232766.5	kelch-like family member 18	74	1	0	1	0	2	0	1	1	2	hsa-miR-122-5p	-0.23	-0.52	0.33	2011
SMARCD1	ENST00000394963.4	SWI/SNF related, matrix associated, actin dependent regulator of chromatin, subfamily d, member 1	952	1	0	1	0	1	0	0	1	1	hsa-miR-122-5p	-0.23	-0.24	0.18	2005, 2007, 2011
PLAG1	ENST00000316981.3	pleiomorphic adenoma gene 1	58	1	0	1	0	0	0	0	0	0	hsa-miR-122-5p	-0.23	-0.28	0.32	2009, 2011
ZNF668	ENST00000535577.1	zinc finger protein 668	124	1	0	1	0	1	0	0	1	0	hsa-miR-122-5p	-0.23	-0.28	0.3	2011
KCNJ13	ENST00000409779.1	potassium inwardly-rectifying channel, subfamily J, member 13	5	1	0	0	1	0	0	0	0	0	hsa-miR-122-5p	-0.22	-0.22	ORF
PLXNA2	ENST00000367033.3	plexin A2	8	1	0	1	0	1	0	0	1	2	hsa-miR-122-5p	-0.22	-0.22	0.34	2009, 2011
MEIS2	ENST00000397624.3	Meis homeobox 2	63	1	0	1	0	0	0	0	0	0	hsa-miR-122-5p	-0.22	-0.22	ORF
GCNT4	ENST00000322348.4	glucosaminyl (N-acetyl) transferase 4, core 2	19	1	1	0	0	0	0	0	0	0	hsa-miR-122-5p	-0.22	-0.22	< 0.1
BCAT2	ENST00000545387.2	branched chain amino-acid transaminase 2, mitochondrial	4270	1	0	1	0	0	0	0	0	0	hsa-miR-122-5p	-0.22	-0.22	0.28	2005, 2007, 2011
NPAS3	ENST00000346562.2	neuronal PAS domain protein 3	9	1	1	0	0	0	0	0	0	0	hsa-miR-122-5p	-0.21	-0.21	0.43	2011
SLC13A5	ENST00000433363.2	solute carrier family 13 (sodium-dependent citrate transporter), member 5	4848	1	1	0	0	0	0	0	0	0	hsa-miR-122-5p	-0.21	-0.21	0.33	2011
SLC39A8	ENST00000394833.2	solute carrier family 39 (zinc transporter), member 8	228	1	0	1	0	0	0	0	0	0	hsa-miR-122-5p	-0.21	-0.23	0.22	2005, 2007
KAT2A	ENST00000225916.5	K(lysine) acetyltransferase 2A	468	1	1	0	0	0	0	0	0	0	hsa-miR-122-5p	-0.21	-0.21	< 0.1	2011
SORT1	ENST00000256637.6	sortilin 1	2111	1	0	1	0	0	0	0	0	0	hsa-miR-122-5p	-0.21	-0.21	0.12
SLC25A29	ENST00000392908.3	solute carrier family 25 (mitochondrial carnitine/acylcarnitine carrier), member 29	1101	1	1	0	0	0	0	0	0	1	hsa-miR-122-5p	-0.21	-0.21	< 0.1	2011
STX16	ENST00000355957.5	syntaxin 16	756	1	0	0	1	1	0	0	1	0	hsa-miR-122-5p	-0.21	-0.23	< 0.1	2005, 2007, 2011
UBE2G1	ENST00000396981.2	ubiquitin-conjugating enzyme E2G 1	5620	1	0	1	0	0	0	0	0	0	hsa-miR-122-5p	-0.21	-0.21	0.12	2009
CCDC97	ENST00000269967.3	coiled-coil domain containing 97	85	1	0	1	0	1	0	0	1	1	hsa-miR-122-5p	-0.21	-0.32	0.34	2007, 2009, 2011
TEAD3	ENST00000402886.3	TEA domain family member 3	137	1	0	1	0	1	0	0	1	1	hsa-miR-122-5p	-0.2	-0.28	0.34	2009, 2011
C17orf105	ENST00000449302.3	chromosome 17 open reading frame 105	5	1	0	1	0	0	0	0	0	0	hsa-miR-122-5p	-0.2	-0.2	0.21
GNPDA1	ENST00000311337.6	glucosamine-6-phosphate deaminase 1	1130	1	0	1	0	0	0	0	0	0	hsa-miR-122-5p	-0.2	-0.2	0.28	2009, 2011
STK24	ENST00000397517.2	serine/threonine kinase 24	486	1	0	1	0	0	0	0	0	0	hsa-miR-122-5p	-0.2	-0.3	0.23	2005, 2007, 2011
H1F0	ENST00000340857.2	H1 histone family, member 0	234	1	0	1	0	0	0	0	0	0	hsa-miR-122-5p	-0.2	-0.2	0.23	2005, 2007
RGMA	ENST00000557420.1	RGM domain family, member A	145	1	0	0	1	0	0	0	0	1	hsa-miR-122-5p	-0.2	-0.2	< 0.1
CTDSPL	ENST00000443503.2	CTD (carboxy-terminal domain, RNA polymerase II, polypeptide A) small phosphatase-like	372	1	1	0	0	0	0	0	0	1	hsa-miR-122-5p	-0.2	-0.25	< 0.1	2009, 2011
SERP1	ENST00000239944.2	stress-associated endoplasmic reticulum protein 1	3242	1	0	1	0	0	0	0	0	1	hsa-miR-122-5p	-0.19	-0.26	0.15	2005, 2007
RALY	ENST00000375114.3	RALY heterogeneous nuclear ribonucleoprotein	1489	1	0	1	0	2	0	1	1	0	hsa-miR-122-5p	-0.19	-0.26	0.23
FOXO3	ENST00000343882.6	forkhead box O3	32	1	1	0	0	1	0	0	1	1	hsa-miR-122-5p	-0.19	-0.27	0.35	2007, 2009, 2011
NDRG3	ENST00000373803.2	NDRG family member 3	960	1	0	0	1	0	0	0	0	0	hsa-miR-122-5p	-0.19	-0.19	< 0.1	2009, 2011
USP53	ENST00000450251.1	ubiquitin specific peptidase 53	300	1	1	0	0	0	0	0	0	1	hsa-miR-122-5p	-0.19	-0.31	0.15	2009, 2011
AKAP10	ENST00000225737.6	A kinase (PRKA) anchor protein 10	700	1	1	0	0	1	0	0	1	0	hsa-miR-122-5p	-0.18	-0.18	0.11
SLC9A6	ENST00000370698.3	solute carrier family 9, subfamily A (NHE6, cation proton antiporter 6), member 6	547	1	0	1	0	0	0	0	0	0	hsa-miR-122-5p	-0.18	-0.19	< 0.1	2005, 2007
IHH	ENST00000295731.6	indian hedgehog	238	1	0	1	0	0	0	0	0	0	hsa-miR-122-5p	-0.18	-0.18	0.23	2007, 2009, 2011
CALCOCO1	ENST00000548263.1	calcium binding and coiled-coil domain 1	68	1	0	1	0	0	0	0	0	1	hsa-miR-122-5p	-0.18	-0.18	< 0.1
DAND5	ENST00000585548.1	DAN domain family member 5, BMP antagonist	11	1	0	1	0	0	0	0	0	0	hsa-miR-122-5p	-0.18	-0.18	0.2	2005, 2007, 2011
MYO9A	ENST00000564571.1	myosin IXA	137	1	1	0	0	1	0	0	1	0	hsa-miR-122-5p	-0.18	-0.2	< 0.1
LRP10	ENST00000359591.4	low density lipoprotein receptor-related protein 10	939	1	1	0	0	1	0	0	1	1	hsa-miR-122-5p	-0.18	-0.22	0.49	2005, 2007, 2009, 2011
MOSPD1	ENST00000370783.3	motile sperm domain containing 1	83	1	0	0	1	0	0	0	0	0	hsa-miR-122-5p	-0.18	-0.22	< 0.1	2005, 2007, 2009, 2011
EGLN3	ENST00000250457.3	egl-9 family hypoxia-inducible factor 3	71	1	0	1	0	0	0	0	0	0	hsa-miR-122-5p	-0.18	-0.18	< 0.1
NEGR1	ENST00000357731.5	neuronal growth regulator 1	28	1	1	0	0	2	0	0	2	1	hsa-miR-122-5p	-0.18	-0.22	0.53	2007, 2009, 2011
BOD1L2	ENST00000585477.1	biorientation of chromosomes in cell division 1-like 2	5	1	0	0	1	0	0	0	0	1	hsa-miR-122-5p	-0.18	-0.18	< 0.1
IL1RN	ENST00000361779.3	interleukin 1 receptor antagonist	19	1	0	0	1	0	0	0	0	0	hsa-miR-122-5p	-0.17	-0.17	< 0.1	2011
G3BP2	ENST00000395719.3	GTPase activating protein (SH3 domain) binding protein 2	4413	1	0	1	0	0	0	0	0	0	hsa-miR-122-5p	-0.17	-0.17	0.32	2005, 2007, 2009, 2011
ATP6V1H	ENST00000355221.3	ATPase, H+ transporting, lysosomal 50/57kDa, V1 subunit H	550	1	0	0	1	0	0	0	0	0	hsa-miR-122-5p	-0.17	-0.26	< 0.1
ZBTB41	ENST00000367405.4	zinc finger and BTB domain containing 41	33	1	0	1	0	0	0	0	0	0	hsa-miR-122-5p	-0.17	-0.19	< 0.1	2009, 2011
FAM84A	ENST00000295092.2	family with sequence similarity 84, member A	69	1	1	0	0	0	0	0	0	0	hsa-miR-122-5p	-0.17	-0.27	0.24	2011
DEDD	ENST00000368006.3	death effector domain containing	239	1	0	1	0	0	0	0	0	2	hsa-miR-122-5p	-0.16	-0.23	0.17	2011
HIF3A	ENST00000377670.4	hypoxia inducible factor 3, alpha subunit	5	1	1	0	0	0	0	0	0	0	hsa-miR-122-5p	-0.16	-0.16	0.55	2009, 2011
SORCS1	ENST00000369698.1	sortilin-related VPS10 domain containing receptor 1	88	1	0	1	0	0	0	0	0	1	hsa-miR-122-5p	-0.16	-0.17	0.3	2007
CDC42BPB	ENST00000361246.2	CDC42 binding protein kinase beta (DMPK-like)	615	1	0	1	0	0	0	0	0	0	hsa-miR-122-5p	-0.16	-0.16	0.34	2007, 2009, 2011
FUT8	ENST00000360689.5	fucosyltransferase 8 (alpha (1,6) fucosyltransferase)	64	1	0	0	1	0	0	0	0	0	hsa-miR-122-5p	-0.15	-0.15	< 0.1	2005, 2007, 2011
OTUD7B	ENST00000369135.4	OTU domain containing 7B	299	1	0	1	0	3	0	0	3	2	hsa-miR-122-5p	-0.15	-0.2	0.29	2011
CBL	ENST00000264033.4	Cbl proto-oncogene, E3 ubiquitin protein ligase	309	2	0	1	1	1	0	1	0	2	hsa-miR-122-5p	-0.15	-0.15	0.22	2011
NAA50	ENST00000240922.3	N(alpha)-acetyltransferase 50, NatE catalytic subunit	260	1	0	0	1	3	0	0	3	0	hsa-miR-122-5p	-0.15	-0.23	< 0.1	2011
SLC12A6	ENST00000397707.2	solute carrier family 12 (potassium/chloride transporter), member 6	17	1	1	0	0	2	0	0	2	1	hsa-miR-122-5p	-0.15	-0.23	0.37	2011
ADAM10	ENST00000260408.3	ADAM metallopeptidase domain 10	385	1	0	0	1	0	0	0	0	0	hsa-miR-122-5p	-0.14	-0.14	ORF	2005, 2007, 2011
GALNT1	ENST00000269195.5	UDP-N-acetyl-alpha-D-galactosamine:polypeptide N-acetylgalactosaminyltransferase 1 (GalNAc-T1)	2466	1	0	0	1	1	0	0	1	0	hsa-miR-122-5p	-0.14	-0.18	< 0.1	2009, 2011
DLG2	ENST00000398309.2	discs, large homolog 2 (Drosophila)	15	1	0	1	0	0	0	0	0	1	hsa-miR-122-5p	-0.14	-0.14	0.19	2007, 2009, 2011
SESN2	ENST00000253063.3	sestrin 2	854	1	1	0	0	0	0	0	0	0	hsa-miR-122-5p	-0.14	-0.14	0.44	2009, 2011
NFAT5	ENST00000354436.2	nuclear factor of activated T-cells 5, tonicity-responsive	128	1	1	0	0	0	0	0	0	0	hsa-miR-122-5p	-0.14	-0.19	0.52	2005, 2007, 2009, 2011
CLCN6	ENST00000312413.6	chloride channel, voltage-sensitive 6	227	1	0	1	0	1	0	0	1	3	hsa-miR-122-5p	-0.14	-0.14	< 0.1
RRAGC	ENST00000373001.3	Ras-related GTP binding C	1062	1	0	0	1	0	0	0	0	0	hsa-miR-122-5p	-0.13	-0.13	< 0.1
LARP4B	ENST00000316157.3	La ribonucleoprotein domain family, member 4B	705	1	0	0	1	0	0	0	0	1	hsa-miR-122-5p	-0.13	-0.16	< 0.1
VAMP3	ENST00000054666.6	vesicle-associated membrane protein 3	515	1	0	0	1	0	0	0	0	0	hsa-miR-122-5p	-0.13	-0.17	< 0.1
TFE3	ENST00000315869.7	transcription factor binding to IGHM enhancer 3	20	1	0	1	0	0	0	0	0	0	hsa-miR-122-5p	-0.13	-0.13	0.21
DDR2	ENST00000367922.3	discoidin domain receptor tyrosine kinase 2	41	1	0	0	1	2	2	0	0	1	hsa-miR-122-5p	-0.13	-0.18	< 0.1	2005, 2007
SPOCK2	ENST00000373109.2	sparc/osteonectin, cwcv and kazal-like domains proteoglycan (testican) 2	31	1	1	0	0	3	0	1	2	1	hsa-miR-122-5p	-0.13	-0.49	< 0.1	2011
IL18BP	ENST00000497194.2	interleukin 18 binding protein	41	1	0	0	1	1	0	0	1	3	hsa-miR-122-5p	-0.13	-0.27	< 0.1
SLC35A4	ENST00000323146.3	solute carrier family 35, member A4	334	1	0	1	0	0	0	0	0	0	hsa-miR-122-5p	-0.12	-0.12	< 0.1	2011
CTDSPL2	ENST00000260327.4	CTD (carboxy-terminal domain, RNA polymerase II, polypeptide A) small phosphatase like 2	457	1	0	1	0	0	0	0	0	0	hsa-miR-122-5p	-0.12	-0.12	0.19
CDC25A	ENST00000302506.3	cell division cycle 25A	5	1	0	1	0	0	0	0	0	0	hsa-miR-122-5p	-0.12	-0.12	< 0.1
MBNL1	ENST00000357472.3	muscleblind-like splicing regulator 1	135	1	0	0	1	1	0	0	1	0	hsa-miR-122-5p	-0.12	-0.12	< 0.1	2005, 2007, 2009, 2011
RAD21	ENST00000297338.2	RAD21 homolog (S. pombe)	5	1	0	1	0	0	0	0	0	0	hsa-miR-122-5p	-0.12	-0.12	0.16	2005, 2007
GIT1	ENST00000579937.1	G protein-coupled receptor kinase interacting ArfGAP 1	18	1	1	0	0	2	0	1	1	2	hsa-miR-122-5p	-0.12	-0.14	0.35	2009, 2011
PDE7A	ENST00000401827.3	phosphodiesterase 7A	84	1	0	0	1	2	0	0	2	0	hsa-miR-122-5p	-0.12	-0.14	< 0.1
HHIP	ENST00000296575.3	hedgehog interacting protein	65	1	0	1	0	0	0	0	0	0	hsa-miR-122-5p	-0.12	-0.21	0.29
PITX2	ENST00000394595.3	paired-like homeodomain 2	75	1	0	0	1	0	0	0	0	0	hsa-miR-122-5p	-0.11	-0.11	ORF
AGO1	ENST00000373204.4	argonaute RISC catalytic component 1	402	1	1	0	0	0	0	0	0	2	hsa-miR-122-5p	-0.11	-0.12	0.52	2005, 2007, 2009, 2011
ESR1	ENST00000440973.1	estrogen receptor 1	5	1	0	1	0	0	0	0	0	1	hsa-miR-122-5p	-0.11	-0.11	0.33	2009
SP2	ENST00000376741.4	Sp2 transcription factor	779	1	0	0	1	1	0	0	1	2	hsa-miR-122-5p	-0.11	-0.12	< 0.1	2005, 2007
DR1	ENST00000370272.4	down-regulator of transcription 1, TBP-binding (negative cofactor 2)	2994	1	0	0	1	2	0	0	2	1	hsa-miR-122-5p	-0.1	-0.15	< 0.1	2005, 2007
BACH2	ENST00000257749.4	BTB and CNC homology 1, basic leucine zipper transcription factor 2	74	1	1	0	0	1	0	0	1	0	hsa-miR-122-5p	-0.1	-0.12	0.38	2005, 2007, 2009, 2011
PLEKHO1	ENST00000369124.4	pleckstrin homology domain containing, family O member 1	144	1	0	0	1	2	0	0	2	4	hsa-miR-122-5p	-0.1	-0.18	< 0.1
SATB1	ENST00000338745.6	SATB homeobox 1	312	1	0	0	1	0	0	0	0	0	hsa-miR-122-5p	-0.09	-0.1	< 0.1
LAMC1	ENST00000258341.4	laminin, gamma 1 (formerly LAMB2)	1082	1	0	1	0	1	0	0	1	1	hsa-miR-122-5p	-0.09	-0.18	< 0.1	2005, 2007, 2009, 2011
USP46	ENST00000441222.3	ubiquitin specific peptidase 46	180	1	1	0	0	0	0	0	0	2	hsa-miR-122-5p	-0.09	-0.31	0.43	2009, 2011
ANKIB1	ENST00000265742.3	ankyrin repeat and IBR domain containing 1	127	1	1	0	0	0	0	0	0	0	hsa-miR-122-5p	-0.09	-0.24	< 0.1
GPR107	ENST00000372410.3	G protein-coupled receptor 107	1429	1	1	0	0	1	0	0	1	1	hsa-miR-122-5p	-0.09	-0.11	< 0.1	2009, 2011
RASSF5	ENST00000367117.3	Ras association (RalGDS/AF-6) domain family member 5	27	1	1	0	0	0	0	0	0	0	hsa-miR-122-5p	-0.09	-0.11	< 0.1	2011
MLLT1	ENST00000252674.7	myeloid/lymphoid or mixed-lineage leukemia (trithorax homolog, Drosophila); translocated to, 1	33	1	0	1	0	0	0	0	0	1	hsa-miR-122-5p	-0.08	-0.15	0.12	2007, 2011
KIAA0247	ENST00000342745.4	KIAA0247	161	1	0	0	1	0	0	0	0	1	hsa-miR-122-5p	-0.08	-0.08	< 0.1
FGF1	ENST00000360966.5	fibroblast growth factor 1 (acidic)	88	1	0	0	1	0	0	0	0	0	hsa-miR-122-5p	-0.08	-0.11	< 0.1	2009, 2011
ARHGAP32	ENST00000524655.1	Rho GTPase activating protein 32	13	1	1	0	0	2	1	0	1	1	hsa-miR-122-5p	-0.08	-0.13	ORF
PAK3	ENST00000372007.5	p21 protein (Cdc42/Rac)-activated kinase 3	8	1	0	1	0	2	0	1	1	0	hsa-miR-122-5p	-0.08	-0.11	< 0.1	2005, 2007
WHSC1L1	ENST00000317025.8	Wolf-Hirschhorn syndrome candidate 1-like 1	481	1	0	1	0	1	0	0	1	1	hsa-miR-122-5p	-0.07	-0.08	< 0.1
POLR3D	ENST00000397802.4	polymerase (RNA) III (DNA directed) polypeptide D, 44kDa	678	1	0	0	1	0	0	0	0	0	hsa-miR-122-5p	-0.07	-0.07	< 0.1
SLC4A8	ENST00000453097.2	solute carrier family 4, sodium bicarbonate cotransporter, member 8	17	1	1	0	0	1	0	0	1	2	hsa-miR-122-5p	-0.07	-0.1	< 0.1
RIMKLA	ENST00000431473.3	ribosomal modification protein rimK-like family member A	100	1	1	0	0	2	0	0	2	2	hsa-miR-122-5p	-0.07	-0.33	< 0.1	2011
PKM	ENST00000319622.6	pyruvate kinase, muscle	65	1	1	0	0	0	0	0	0	0	hsa-miR-122-5p	-0.07	-0.4	0.25	2009, 2011
MRRF	ENST00000344641.3	mitochondrial ribosome recycling factor	85	1	0	0	1	1	0	1	0	0	hsa-miR-122-5p	-0.07	-0.29	< 0.1
CCDC9	ENST00000221922.6	coiled-coil domain containing 9	391	1	1	0	0	1	0	1	0	1	hsa-miR-122-5p	-0.07	-0.18	< 0.1
GREM2	ENST00000318160.4	gremlin 2, DAN family BMP antagonist	631	1	0	0	1	0	0	0	0	0	hsa-miR-122-5p	-0.07	-0.07	< 0.1	2009
MGAT5	ENST00000409645.1	mannosyl (alpha-1,6-)-glycoprotein beta-1,6-N-acetyl-glucosaminyltransferase	1627	1	1	0	0	1	0	1	0	2	hsa-miR-122-5p	-0.06	-0.07	< 0.1
FOXP1	ENST00000318789.4	forkhead box P1	264	1	0	1	0	0	0	0	0	0	hsa-miR-122-5p	-0.06	-0.15	0.23
LUZP1	ENST00000418342.1	leucine zipper protein 1	434	1	0	0	1	0	0	0	0	1	hsa-miR-122-5p	-0.06	-0.06	< 0.1	2005, 2007, 2011
CREB1	ENST00000432329.2	cAMP responsive element binding protein 1	295	1	0	0	1	2	0	0	2	1	hsa-miR-122-5p	-0.05	-0.25	< 0.1	2011
KDM2A	ENST00000398645.2	lysine (K)-specific demethylase 2A	729	1	0	1	0	0	0	0	0	0	hsa-miR-122-5p	-0.05	-0.05	< 0.1
SOX6	ENST00000316399.6	SRY (sex determining region Y)-box 6	22	1	0	0	1	0	0	0	0	0	hsa-miR-122-5p	-0.05	-0.14	< 0.1	2011
RBM47	ENST00000319592.4	RNA binding motif protein 47	264	1	0	0	1	0	0	0	0	1	hsa-miR-122-5p	-0.05	-0.05	< 0.1	2005, 2007, 2009, 2011
NHSL2	ENST00000540800.1	NHS-like 2	5	1	1	0	0	0	0	0	0	1	hsa-miR-122-5p	-0.05	-0.05	0.21
CRY2	ENST00000443527.2	cryptochrome 2 (photolyase-like)	63	1	1	0	0	0	0	0	0	1	hsa-miR-122-5p	-0.05	-0.05	< 0.1
CADM2	ENST00000383699.3	cell adhesion molecule 2	5	1	0	0	1	0	0	0	0	1	hsa-miR-122-5p	-0.05	-0.05	< 0.1
G6PC	ENST00000253801.2	glucose-6-phosphatase, catalytic subunit	5	1	0	0	1	6	0	0	6	3	hsa-miR-122-5p	-0.05	-0.26	< 0.1	2011
TP53	ENST00000420246.2	tumor protein p53	836	1	0	0	1	0	0	0	0	0	hsa-miR-122-5p	-0.04	-0.04	ORF
BRWD1	ENST00000342449.3	bromodomain and WD repeat domain containing 1	96	1	0	1	0	1	0	0	1	0	hsa-miR-122-5p	-0.04	-0.07	0.29	2007, 2009, 2011
SMYD4	ENST00000305513.7	SET and MYND domain containing 4	53	1	0	0	1	3	0	0	3	0	hsa-miR-122-5p	-0.04	-0.04	< 0.1	2005, 2007, 2009, 2011
CCRN4L	ENST00000280614.2	CCR4 carbon catabolite repression 4-like (S. cerevisiae)	101	1	0	0	1	0	0	0	0	0	hsa-miR-122-5p	-0.04	-0.05	< 0.1	2007, 2011
GATAD2B	ENST00000368655.4	GATA zinc finger domain containing 2B	48	1	0	1	0	0	0	0	0	2	hsa-miR-122-5p	-0.04	-0.19	0.24	2011
DLAT	ENST00000280346.6	dihydrolipoamide S-acetyltransferase	1073	1	1	0	0	0	0	0	0	0	hsa-miR-122-5p	-0.03	-0.31	0.26	2011
LMNB2	ENST00000325327.3	lamin B2	89	1	1	0	0	0	0	0	0	2	hsa-miR-122-5p	-0.03	-0.54	0.52	2009, 2011
SNX13	ENST00000409389.1	sorting nexin 13	100	1	1	0	0	0	0	0	0	0	hsa-miR-122-5p	-0.03	-0.03	0.26	2005, 2007
XIAP	ENST00000371199.3	X-linked inhibitor of apoptosis	153	1	0	0	1	3	0	0	3	0	hsa-miR-122-5p	-0.03	-0.05	< 0.1
PCDH7	ENST00000543491.1	protocadherin 7	95	1	0	0	1	0	0	0	0	0	hsa-miR-122-5p	-0.03	-0.03	< 0.1
BHLHE41	ENST00000242728.4	basic helix-loop-helix family, member e41	50	1	0	0	1	0	0	0	0	0	hsa-miR-122-5p	-0.03	-0.12	< 0.1	2005, 2007, 2009, 2011
PIGV	ENST00000078527.4	phosphatidylinositol glycan anchor biosynthesis, class V	122	1	0	1	0	0	0	0	0	0	hsa-miR-122-5p	-0.03	-0.15	0.29
LRRC14	ENST00000292524.1	leucine rich repeat containing 14	469	1	1	0	0	0	0	0	0	1	hsa-miR-122-5p	-0.02	-0.03	< 0.1	2005, 2007
RAP1GAP2	ENST00000254695.8	RAP1 GTPase activating protein 2	123	1	1	0	0	0	0	0	0	0	hsa-miR-122-5p	-0.02	-0.03	0.1	2009, 2011
TFDP2	ENST00000499676.2	transcription factor Dp-2 (E2F dimerization partner 2)	128	1	0	1	0	4	0	0	4	2	hsa-miR-122-5p	-0.02	-0.2	< 0.1
LNPEP	ENST00000231368.5	leucyl/cystinyl aminopeptidase	28	1	1	0	0	1	0	0	1	1	hsa-miR-122-5p	-0.02	-0.11	0.35
SLC29A4	ENST00000396872.3	solute carrier family 29 (equilibrative nucleoside transporter), member 4	61	1	0	0	1	0	0	0	0	1	hsa-miR-122-5p	-0.02	-0.08	< 0.1
ERBB4	ENST00000342788.4	v-erb-b2 avian erythroblastic leukemia viral oncogene homolog 4	27	1	0	0	1	0	0	0	0	0	hsa-miR-122-5p	-0.01	-0.02	< 0.1
PXMP4	ENST00000344022.3	peroxisomal membrane protein 4, 24kDa	158	1	1	0	0	2	0	0	2	4	hsa-miR-122-5p	-0.01	-0.33	0.11	2009, 2011
POMT2	ENST00000261534.4	protein-O-mannosyltransferase 2	526	1	1	0	0	1*	0	0	0	1	hsa-miR-122-5p	-0.01	-0.36	0.14	2009, 2011
PTPRB	ENST00000334414.6	protein tyrosine phosphatase, receptor type, B	42	1	1	0	0	0	0	0	0	1	hsa-miR-122-5p	-0.01	-0.04	< 0.1	2009, 2011
EVC	ENST00000382674.2	Ellis van Creveld syndrome	165	1	0	0	1	0	0	0	0	1	hsa-miR-122-5p	-0.01	-0.01	< 0.1
WDR55	ENST00000358337.5	WD repeat domain 55	251	1	0	0	1	0	0	0	0	0	hsa-miR-122-5p	-0.01	-0.01	ORF
BEST1	ENST00000449131.2	bestrophin 1	83	1	1	0	0	0	0	0	0	1	hsa-miR-122-5p	-0.01	-0.16	< 0.1
CCDC6	ENST00000263102.6	coiled-coil domain containing 6	193	1	0	1	0	0	0	0	0	0	hsa-miR-122-5p	-0.01	-0.2	0.2	2005, 2007, 2009, 2011
ZNF703	ENST00000331569.4	zinc finger protein 703	1557	1	0	0	1	0	0	0	0	1	hsa-miR-122-5p	0	-0.02	< 0.1
OBFC1	ENST00000224950.3	oligonucleotide/oligosaccharide-binding fold containing 1	184	1	1	0	0	0	0	0	0	3	hsa-miR-122-5p	0	-0.18	< 0.1	2011
MRPL3	ENST00000264995.3	mitochondrial ribosomal protein L3	943	1	1	0	0	0	0	0	0	0	hsa-miR-122-5p	0	-0.28	< 0.1
C18orf32	ENST00000579820.1	chromosome 18 open reading frame 32	733	1	1	0	0	2	1	0	1	0	hsa-miR-122-5p	0	-0.68	0.11	2011
DICER1	ENST00000541352.1	dicer 1, ribonuclease type III	25	1	0	1	0	0	0	0	0	1	hsa-miR-122-5p	0	-0.12	< 0.1	2011
ACP1	ENST00000272067.6	acid phosphatase 1, soluble	499	1	1	0	0	0	0	0	0	1	hsa-miR-122-5p	0	-0.43	< 0.1
STRN	ENST00000263918.4	striatin, calmodulin binding protein	476	1	1	0	0	3	0	2	1	0	hsa-miR-122-5p	0	-0.08	< 0.1	2011
RPL17-C18orf32	ENST00000584895.1	RPL17-C18orf32 readthrough	733	1	1	0	0	0	0	0	0	0	hsa-miR-122-5p	0	-0.41	< 0.1	2011
MEF2D	ENST00000464356.2	myocyte enhancer factor 2D	759	1	0	1	0	0	0	0	0	2	hsa-miR-122-5p	0	-0.12	0.31	2007, 2009, 2011
ECE2	ENST00000324557.4	endothelin converting enzyme 2	1271	1	0	1	0	0	0	0	0	0	hsa-miR-122-5p	0	-0.2	0.28
NIT1	ENST00000368007.4	nitrilase 1	437	1	0	1	0	0	0	0	0	0	hsa-miR-122-5p	0	-0.17	0.27
